# Supplementary material for: Synergistic activating effect of promoter and oxidant in single step conversion of methane into methanol over a tailored polymer-Ag coordination complex
Source: Royal Society of Chemistry journal article supplement (doi:10.1039/c7ra02700a), 2017-01-01
Supplement: c7ra02700a1.pdf [file c7ra02700a1.pdf]

## Electronic supplementary information

Synergistic activating effect of promoter and oxidant in single step conversion of methane into methanol over tailored polymer-Ag coordination complex.

*Raghavendra Shavi<sup>a</sup>, Vishwanath Hiremath<sup>a</sup>, Aditya Sharma<sup>b</sup>, Sung Ok Won<sup>b</sup>, and Jeong Gil Seo<sup>a,\*</sup>.*

<sup>a</sup>Department of Energy Science and Technology, Myongji University, Nam-dong, Cheoin-gu, Yongin-si, Gyeonggi-do 449-728, South Korea

<sup>b</sup>X-ray Open Laboratory, Advanced Analysis Center, Korea Institute of Science and Technology, Seoul- 02792, South Korea

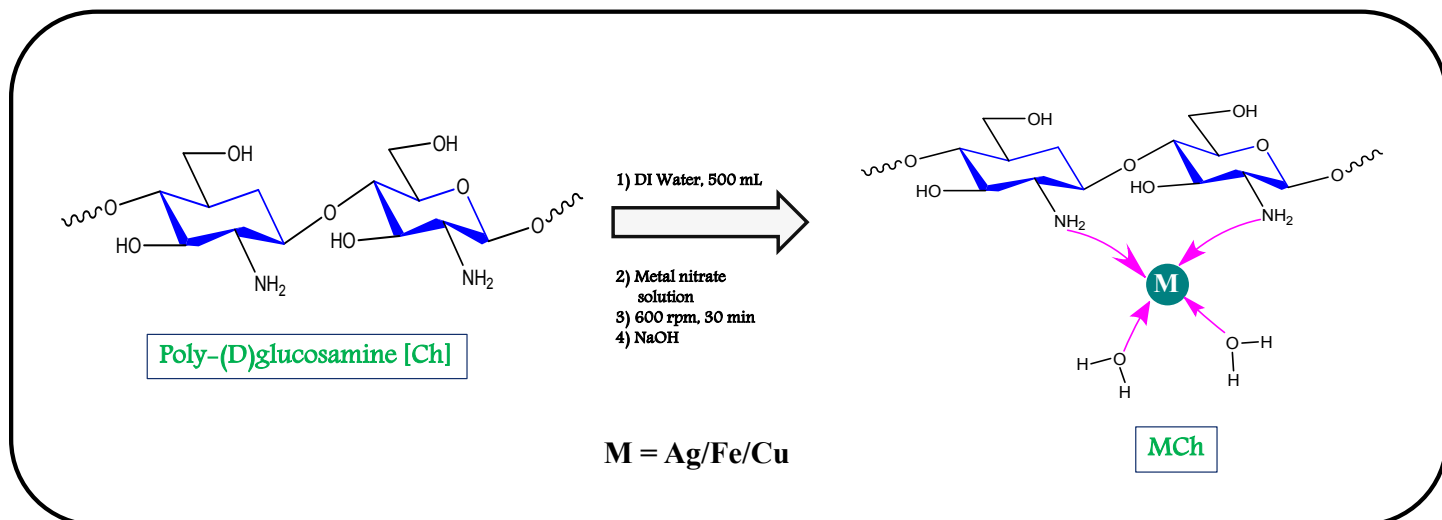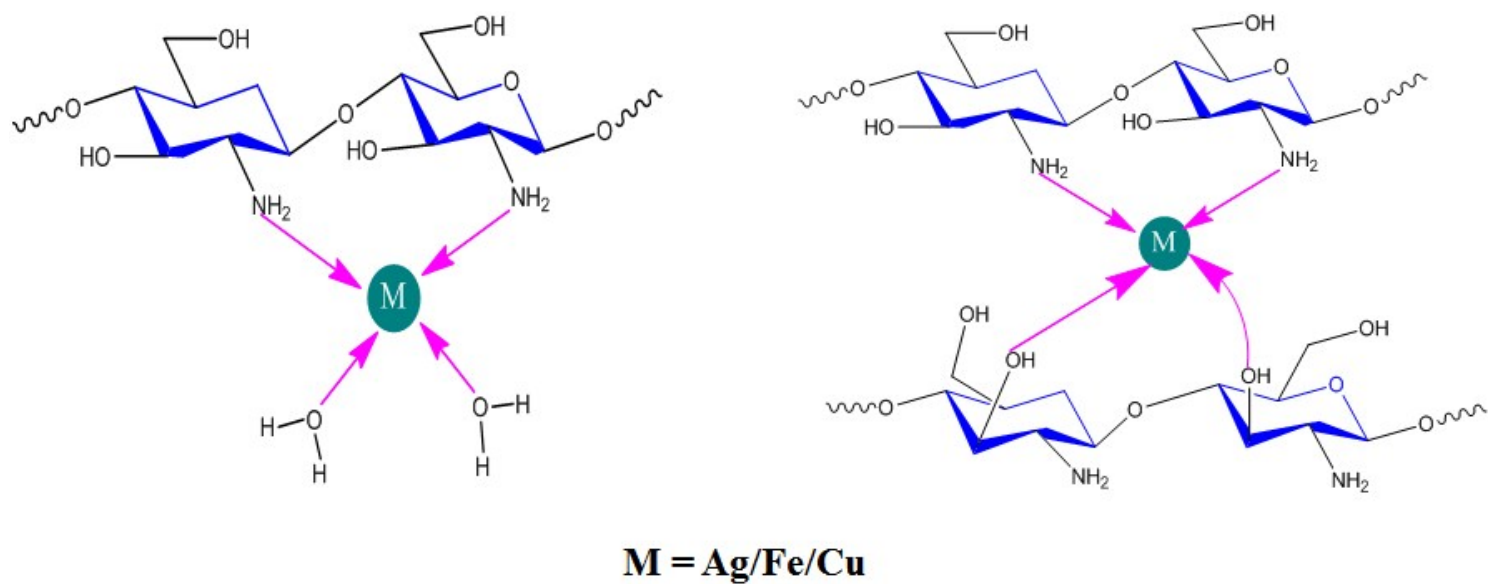

**Scheme. S1.** Synthetic path way of polymer-metal complexes and their possible structures

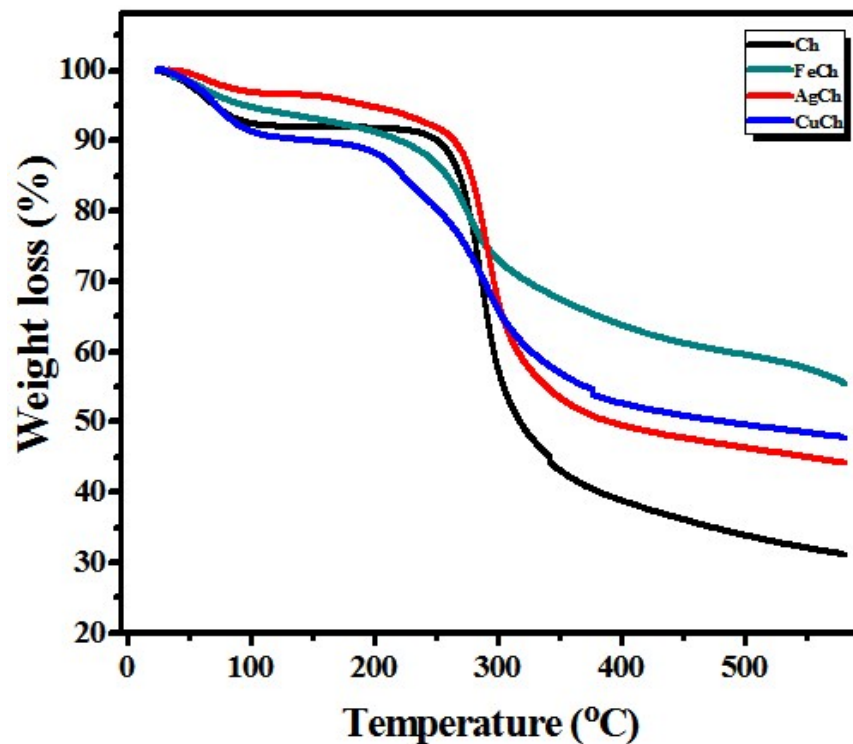

**Fig. S1.** Thermogravimetric analysis (TGA) spectra obtained for Ch and prepared catalysts

The TGA curve for 'Ch' gave two sharp peaks. One below 100 and other starts at 230 °C which are attributed to loss of moisture and functional groups respectively. A continues slow degradation of Ch was observed after 400 °C which informs that the 'Ch' forming carbon at higher temperatures. After complexation the temperature required for functional groups degradation was slightly high. This is because of the strong coordination of functional groups of Ch to metal.

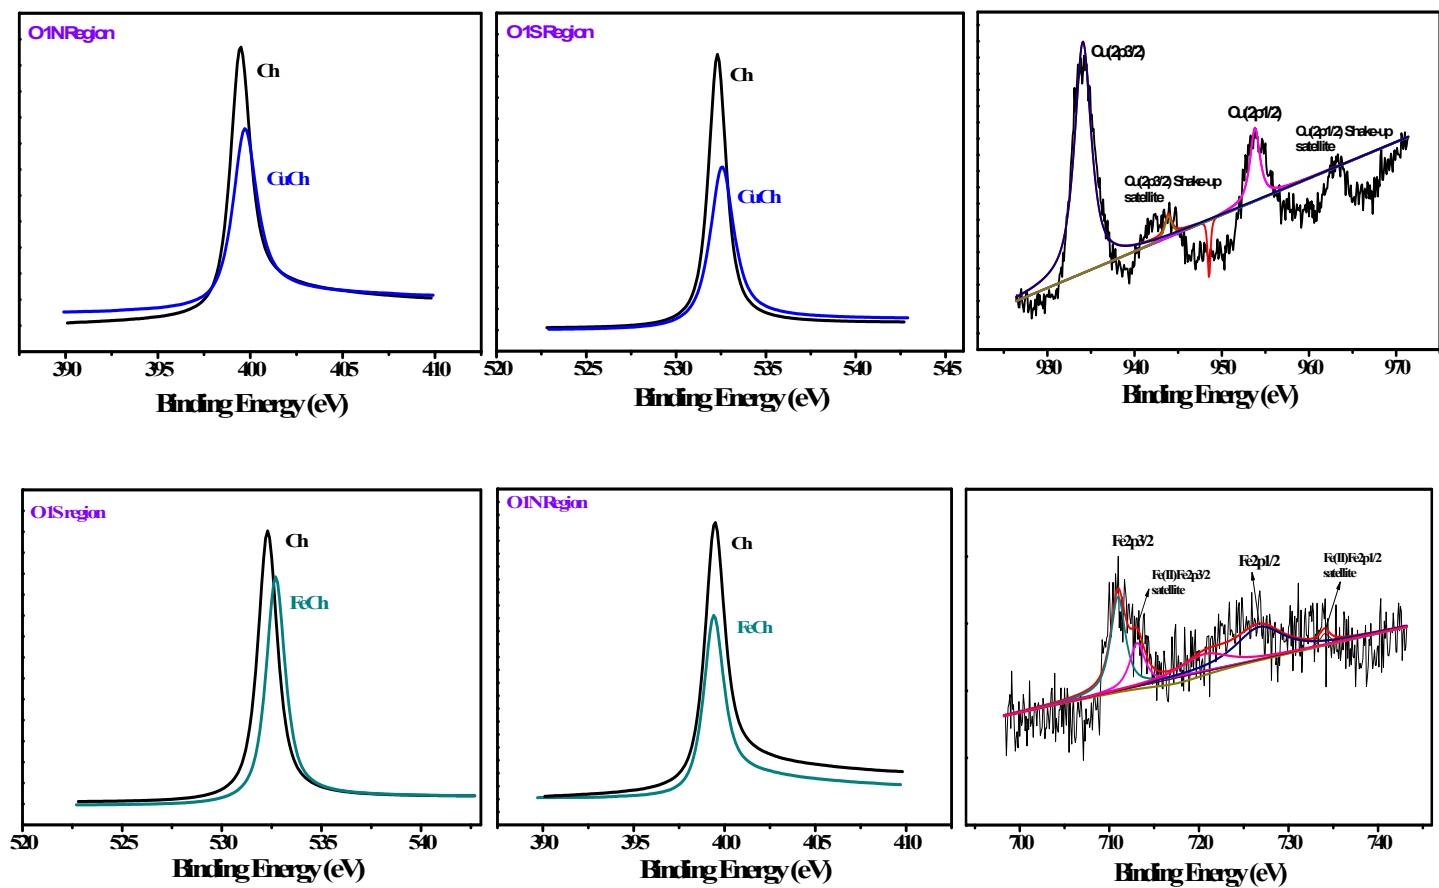

Fig. S2. High resolution XPS spectra for different regions of Cuch (upper row) and FeCh (lower row)

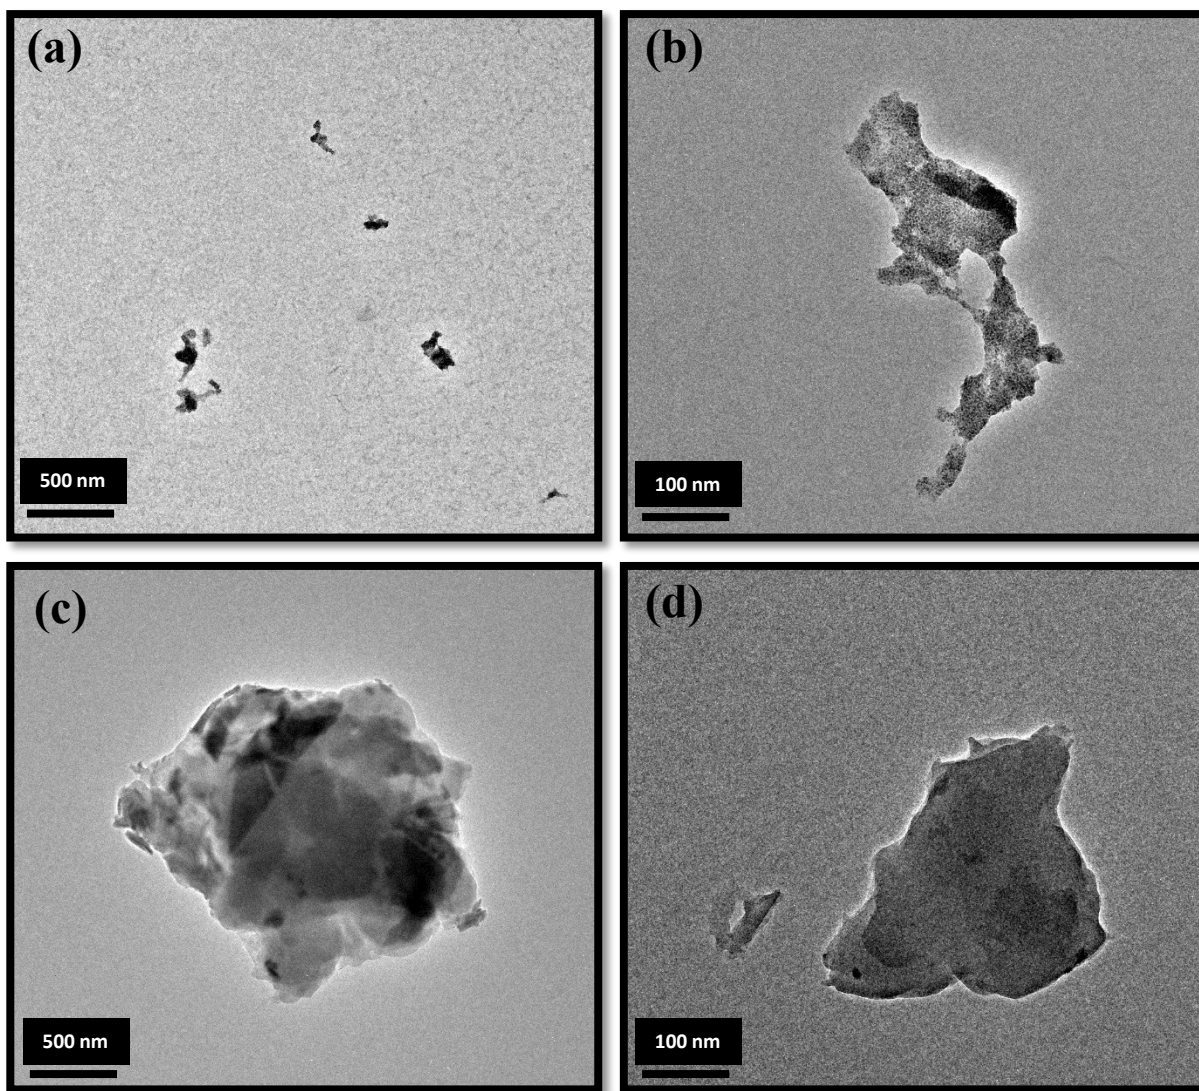

**Fig. S3.** Transmission Electron Microscopy (TEM) images for (a,b) FeCh and (c,d) CuCh at different magnification

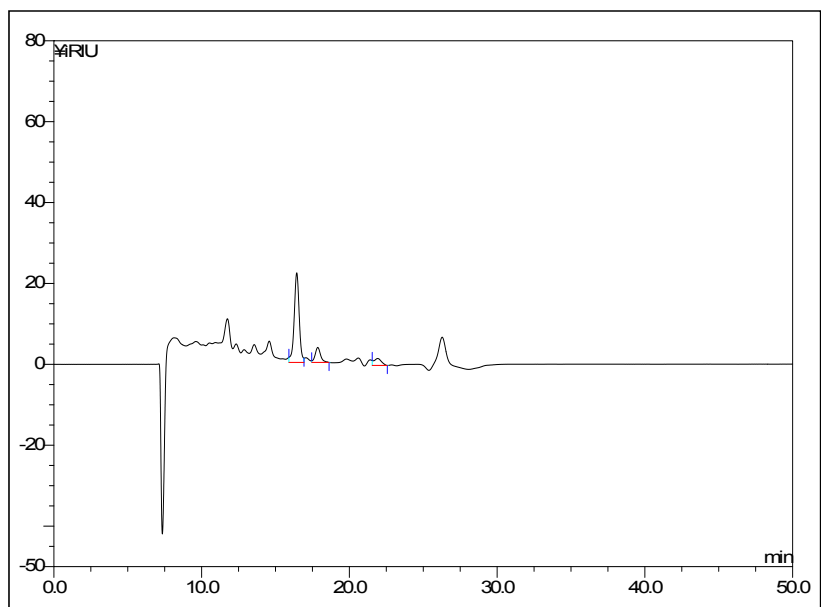

**Fig. S4.** Ion chromatogram obtained after analyzing liquid products.

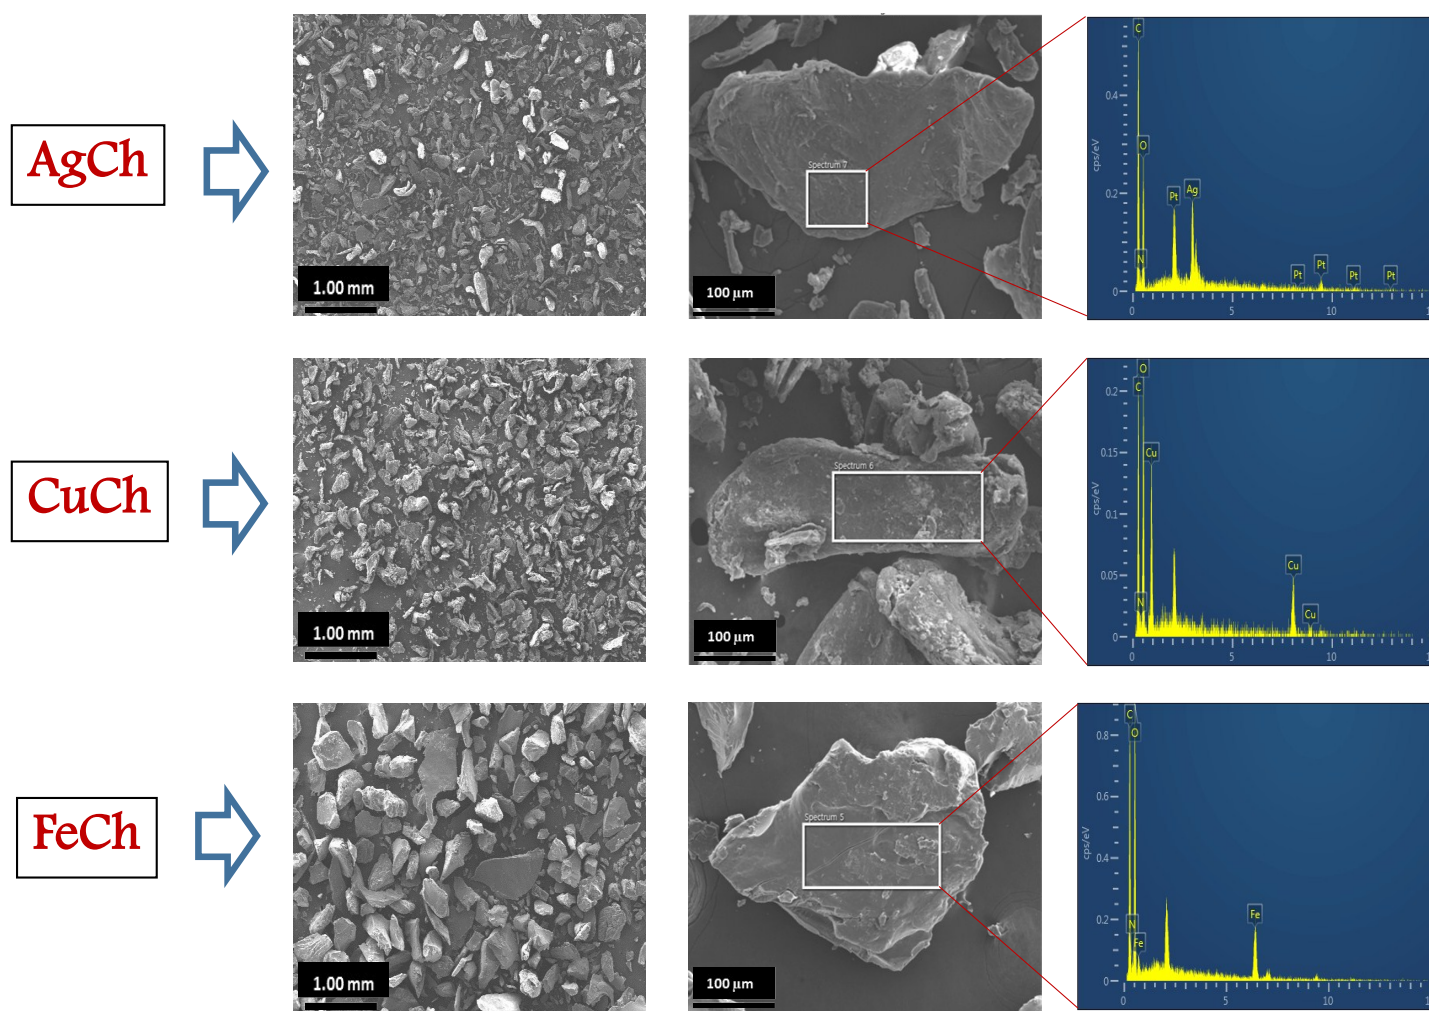

**Fig. S5.** FESEM- Energy Dispersive X-Ray (EDX) spectroscopic analysis for prepared catalysts.

Field Emission Scanning Electron Microscopy (FESEM) images were recorded using a Sigma Z300 instrument equipped with an energy dispersive X-ray spectrometer (EDS).

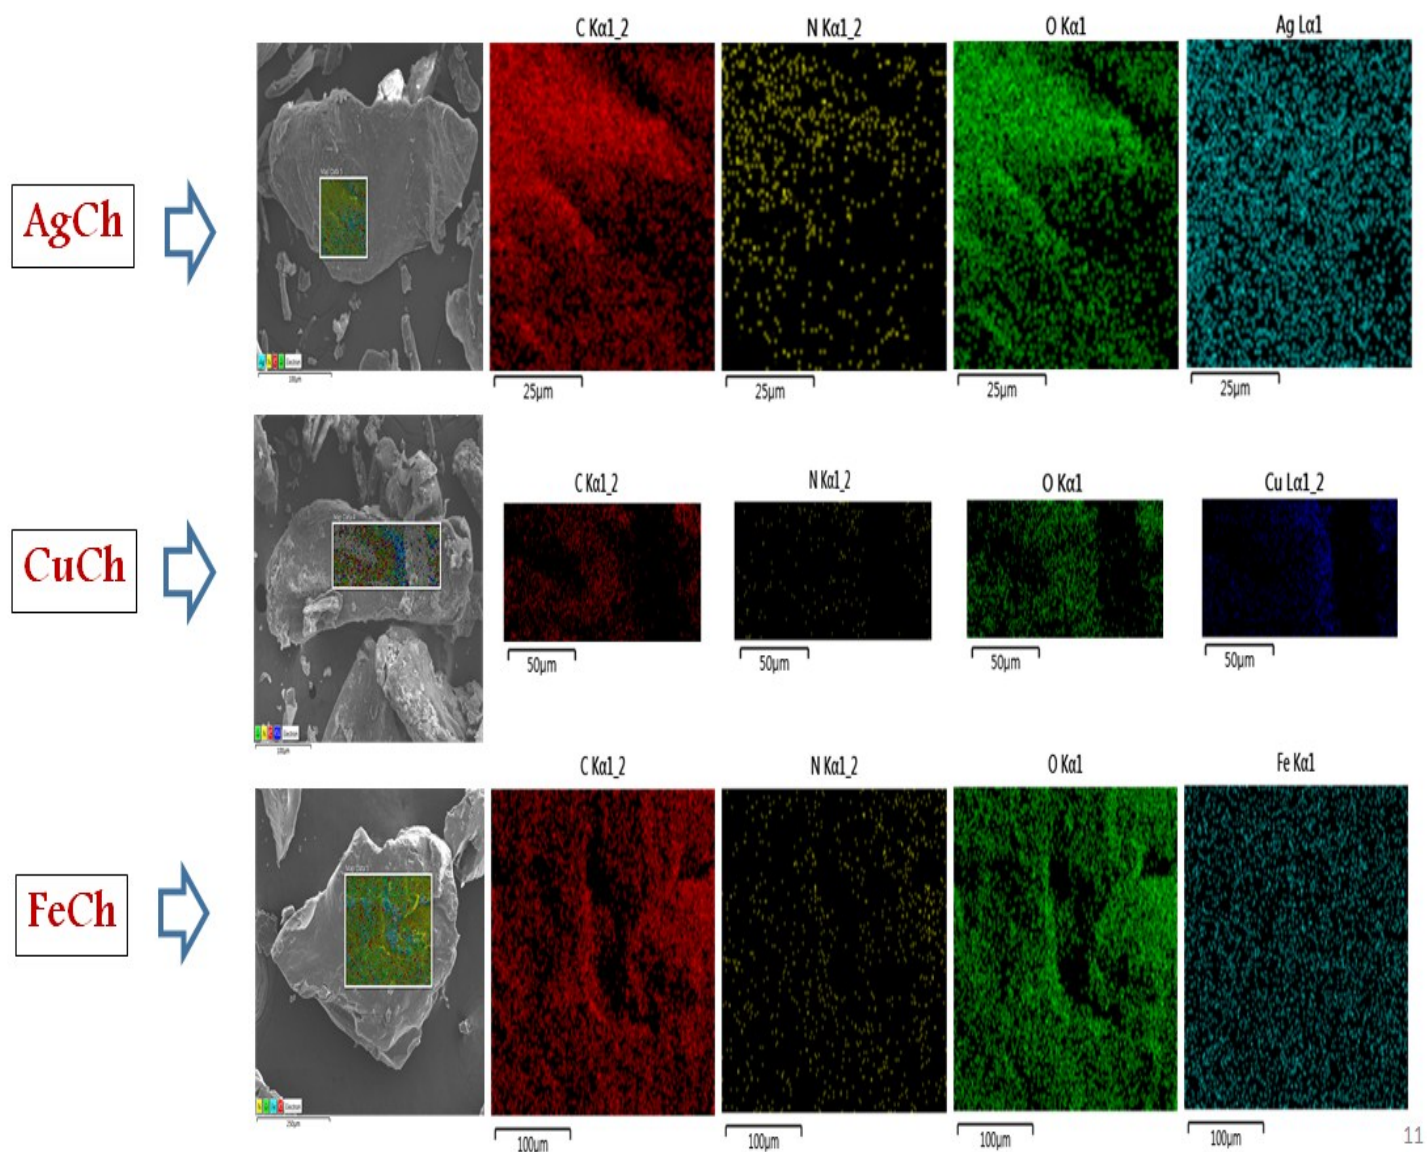

**Fig. S6.** FESEM elemental mapping for prepared catalysts



**Table S1 (a). Metal concentration in catalysts detected by ICP-AES technique**

| <b>Serial</b> | <b>Sample</b> | <b>Test Item</b> | <b>value</b> | <b>Unit</b> |
|---------------|---------------|------------------|--------------|-------------|
| 1             | AgCh          | Ag               | 20564.95     | mg/Kg       |
| 2             | FeCh          | Fe               | 86038.45     | mg/Kg       |
| 3             | CuCh          | Cu               | 84970.03     | mg/Kg       |

**Table S1 (b). C, H, N & S elemental concentration in catalysts**

| <b>Serial</b> | <b>Sample</b> | <b>Mass (mg)</b> | <b>N (wt%)</b> | <b>C(wt%)</b> | <b>H(wt%)</b> |
|---------------|---------------|------------------|----------------|---------------|---------------|
| 1             | Ch            | 1.781            | 7.45           | 41.27         | 7.31          |
| 2             | AgCh          | 1.776            | 7.30           | 39.48         | 7.17          |
| 3             | FeCh          | 1.768            | 6.41           | 34.85         | 6.26          |
| 4             | CuCh          | 1.761            | 6.31           | 35.03         | 6.30          |

**Table S2.** Product quantification and percentage of CH<sub>4</sub> conversion for different pristine materials used for catalyst preparation

| Entry | Catalyst                             | oxidant                       | Product formed (μmol) |       |                      |                 | CH <sub>4</sub> conversion (%) |
|-------|--------------------------------------|-------------------------------|-----------------------|-------|----------------------|-----------------|--------------------------------|
|       |                                      |                               | CH <sub>3</sub> OH    | HCOOH | CH <sub>3</sub> COOH | CO <sub>2</sub> |                                |
| 1     | FeNO <sub>3</sub> .9H <sub>2</sub> O | H <sub>2</sub> O <sub>2</sub> | -                     | 24    | -                    | -               | 0.02                           |
| 2     | CuNO <sub>3</sub> .5H <sub>2</sub> O | H <sub>2</sub> O <sub>2</sub> | -                     | 264   | -                    | 12.3            | 0.20                           |
| 3     | AgNO <sub>3</sub>                    | H <sub>2</sub> O <sub>2</sub> | -                     | 490   | -                    | 15.2            | 0.38                           |
| 4     | Ch                                   | H <sub>2</sub> O <sub>2</sub> | 12                    | 24    | 2                    | 0               | 0.03                           |

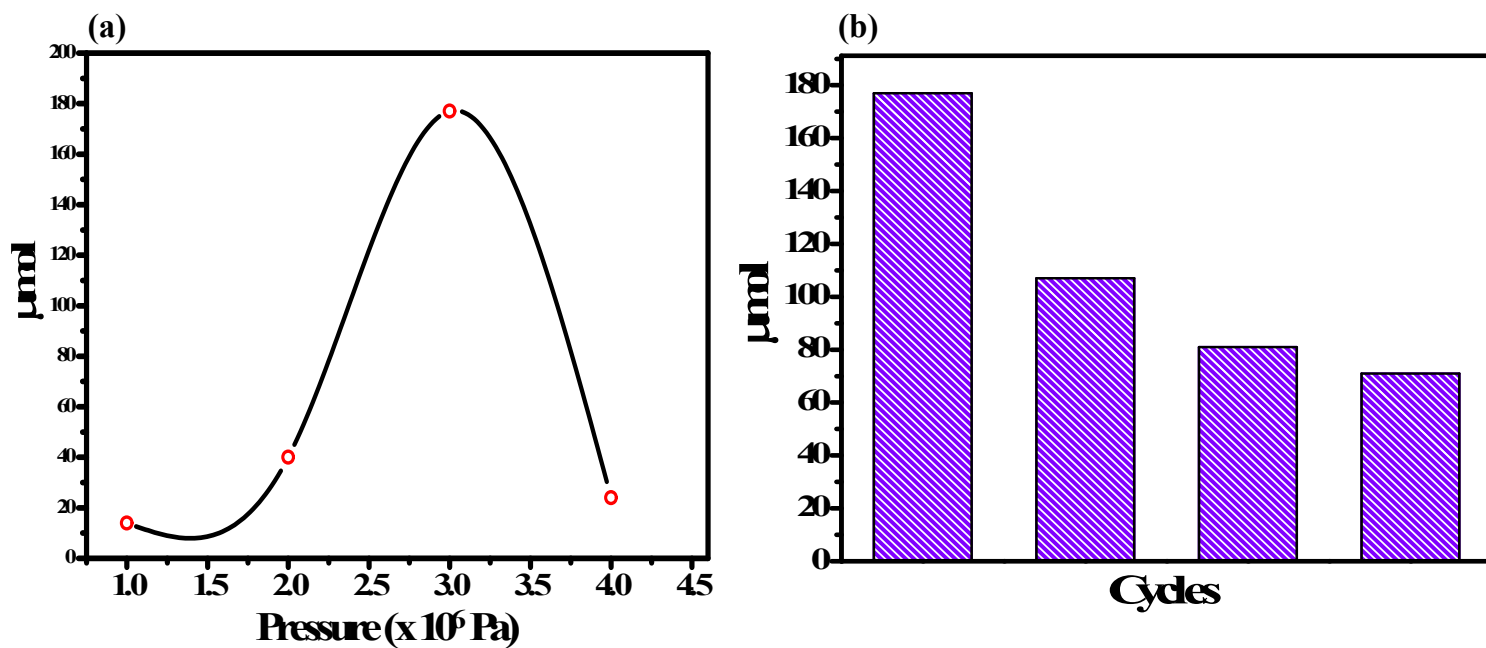

**Fig. S7** (a) Effect of CH<sub>4</sub> pressure on the reaction: 150 mg catalyst, 3 hr, 60 °C (b) reusability data: 30 bar, 150 mg catalyst, 60 °C

Fig S7 (a) informs that, the  $3 \times 10^6$  Pa pressure is appropriate for the CH<sub>4</sub> to methanol conversion reaction using AgCh catalyst. A pressure higher than this, causes instability in the catalyst to bear pressure. The catalyst appeared to lose the coordination with metal after  $3.5 \times 10^6$  Pa pressure. A cyclic performance of the AgCh catalyst is shown in Fig.S7 (b). There was continuous decrease in catalytic activity. This may be due to loss in active site which occurs in case of coordination complexes<sup>1</sup>.

**Table S3.** Catalysts comparison from literature for CH<sub>4</sub> conversion and methanol selectivity

| Catalyst        | Additives                                          | Temperature (°C) | CH <sub>4</sub> conversion (%) | Methanol selectivity (%) | Ref.      |
|-----------------|----------------------------------------------------|------------------|--------------------------------|--------------------------|-----------|
| Al/ZSM-5        | Fe                                                 | 50               | 0.2                            | 22                       | [2]       |
| Cu-Fe/ZSM-5     | -                                                  | 50               | 0.7                            | 85                       | [2]       |
| Cu/Silicates-1  | -                                                  | 50               | 0                              | 0                        | [2]       |
| Fe-Silicate     | -                                                  | 70               | 10.5                           | 8                        | [2]       |
| AgCh            | [BMIM] <sup>+</sup> Cl <sup>-</sup>                | 60               | 4.5                            | 0                        | This work |
| AgCh            | [BMIM] <sup>+</sup> Cl <sup>-</sup> O <sub>2</sub> | 60               | 4                              | 54                       | This work |
| Au <sup>0</sup> | 2% SO <sub>3</sub>                                 | 180              | 0                              | 0                        | [3]       |
| Au <sup>0</sup> | 3 M SeO <sub>3</sub> + 2% SO <sub>3</sub>          | 180              | 28                             | 94                       | [3]       |
| ZSM-5           | -                                                  | 50               | 1.1                            | 11.6                     | [4]       |

**Table S4. Catalysts comparison for CH<sub>4</sub> conversion to its oxygenates in terms of TON**

| Catalyst                                                                 | Specifications                                                      | TON <sup>[a]</sup> | Ref.      |
|--------------------------------------------------------------------------|---------------------------------------------------------------------|--------------------|-----------|
| Cu-ZSM-5                                                                 | No solvent used                                                     | 0.02               | 5         |
| (Bipym)Pt <sup>II</sup> Cl <sub>2</sub>                                  | H <sub>2</sub> SO <sub>4</sub> , Ionic liquid                       | 0.5                | 6         |
| Pd(OAc) <sub>2</sub> , NaNO <sub>2</sub> , O <sub>2</sub> , Benzoquinone | CF <sub>3</sub> COOH                                                | 3~7                | 7         |
| FeCl <sub>3</sub>                                                        | aqueous                                                             | 7                  | 8         |
| PdSO <sub>4</sub>                                                        | H <sub>2</sub> SO <sub>4</sub>                                      | 14.2               | 9         |
| sMMO                                                                     | --                                                                  | 19                 | 10        |
| AgCh                                                                     | H <sub>2</sub> O <sub>2</sub>                                       | 22                 | This work |
| CuCh                                                                     | H <sub>2</sub> O <sub>2</sub>                                       | 2                  | This work |
| FeCh                                                                     | H <sub>2</sub> O <sub>2</sub>                                       | 3                  | This work |
| (FetBuPc) <sub>2</sub> N/SiO <sub>2</sub>                                | H <sub>2</sub> O <sub>2</sub> , H <sub>2</sub> SO <sub>4</sub>      | 209                | 11        |
| K <sub>2</sub> [PtCl <sub>4</sub> ]-CTF                                  | 30% Oleum                                                           | <250               | 12        |
| AgCh                                                                     | H <sub>2</sub> O <sub>2</sub> , [BMIM] <sup>+</sup> Cl <sup>-</sup> | 301                | This work |
| AgCh, O <sub>2</sub>                                                     | H <sub>2</sub> O <sub>2</sub> , [BMIM] <sup>+</sup> Cl <sup>-</sup> | 266                | This work |
| AgCh                                                                     | H <sub>2</sub> O <sub>2</sub> , [BMIM] <sup>+</sup> Br <sup>-</sup> | 144                | This work |
| AgCh, O <sub>2</sub>                                                     | H <sub>2</sub> O <sub>2</sub> , [BMIM] <sup>+</sup> Br <sup>-</sup> | 135                | This work |

[a] TON = Total moles of oxygenated produced/moles of Ag utilized for the reaction

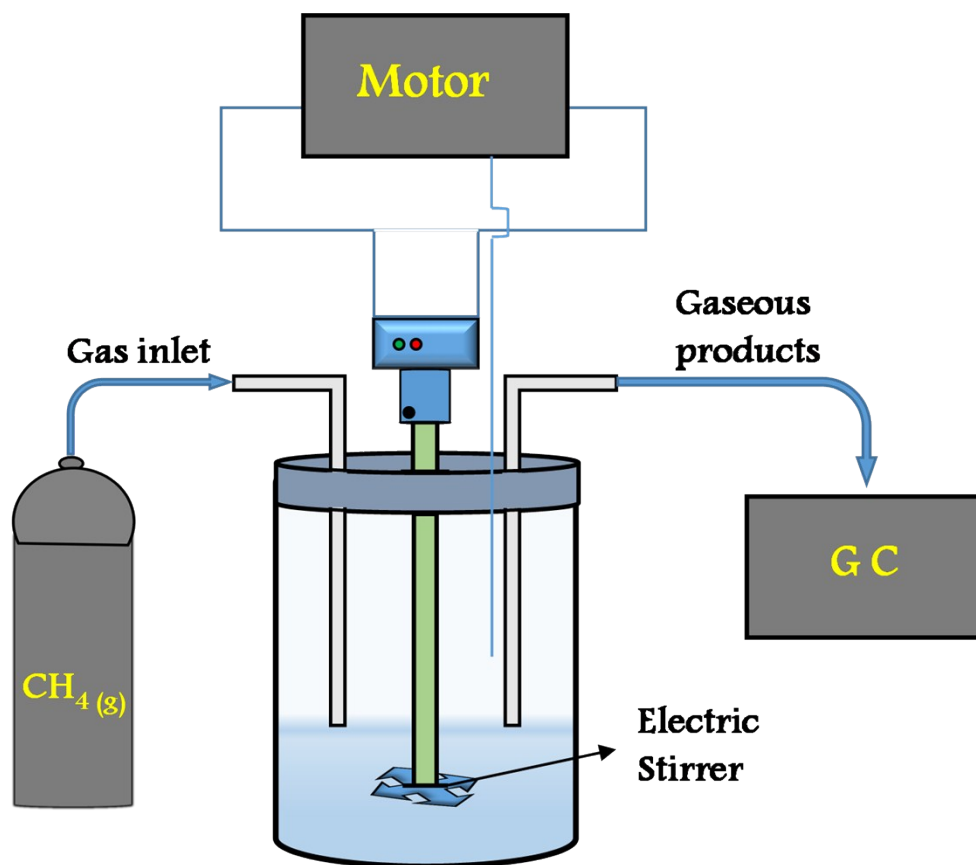

**Fig. S8.** A rough diagram of the instrumentation used to carry out the reaction

## ■ Notes and references

- (1) C.-C. Liu, C.-Y. Mou, S. S.-F. Yu and S. I. Chan, *Energy Environ. Sci.*, 2016, **9**, 1361–1374.
- (2) C. Hammond, M. M. Forde, M. H. Ab Rahim, A. Thetford, Q. He, R. L. Jenkins, N. Dimitratos, J. A. Lopez-Sanchez, N. F. Dummer, D. M. Murphy, A. F. Carley, S. H. Taylor, D. J. Willock, E. E. Stangland, J. Kang, H. Hagen, C. J. Kiely and G. J. Hutchings, *Angew. Chemie Int. Ed.*, 2012, **51**, 5129–5133.
- (3) C. J. Jones, D. Taube, V. R. Ziatdinov, R. A. Periana, R. J. Nielsen, J. Oxgaard, and W. A. Goddard, *Angew. Chem. Int. Ed.* 2004, **43**, 2-5.
- (4) S. A. Shihri, C, J. Richard, D. Chadwick, *ChemCatChem*, 2017, **9**, 1276-1283.
- (5) M. H. Groothaert, P. J. Smeets, B. F. Sels, p. A. Jacobs, R. A. Schoonheydt, *J. Am. Chem. Soc.* 2005, **127**, 1394–1395.
- (6) J. Cheng, Z. Li, M. Haught, Y. Tang, *Chem. Commun. (Camb)*. 2006, No. **44**, 4617–4619.
- (7) Z. An, X. Pan, X. Liu, X. Han, X. Bao, *J. Am. Chem. Soc.* 2006, **128**, 16028–16029.
- (8) Q. Yuan, W. Deng, Q. Zhang, Y. Wang, *Adv. Synth. Catal.* 2007, **349**, 1199–1209.
- (9) M. Zerilla, A. Kahros, A. T. Bell, *J. Catal.* 2006, **237**, 111–117.
- (10) J. Colby, D. I. Stirling, H. Dolton, *Biochem. J.* 1977, **165**, 395–402.
- (11) A. B. Sorokin, E. V. Kudrik, L. X. Alvarez, P. Afanasiev, M. M. J. Millet, D. Bouchu, *Catal. Today* 2010, **157**, 149–154.

- (12) R. Palkovits, M. Antonietti, P. Kuhn, A. Thomas, F. Schuth, ref183. *Angew. Chem. Int. Ed. Engl.* 2009, No. **48**, 6909–6912.
